# Supplementary material
Source: MDPI journal article supplement (https://www.mdpi.com/1424-8247/14/12/1232)
Supplement: s1 [file s1]

*Supplementary information:*

## **Biostimulation of bacteria in liquid culture for identification of new antimicrobial compounds**

Hooman Mirzaee<sup>1\*</sup>, Emily Ariens<sup>1</sup>, Mark A. T. Blaskovich<sup>2</sup>, Richard J Clark<sup>3</sup>, Peer M Schenk<sup>1\*</sup>

<sup>1</sup>Plant-Microbe Interactions Laboratory, School of Agriculture and Food Sciences, <sup>2</sup>Centre for Superbug Solutions, Institute for Molecular Bioscience, <sup>3</sup>Peptide Chemical Biology Laboratory, School of Biomedical Sciences, The University of Queensland, Brisbane, Queensland 4072, Australia

\*Corresponding author email: h.mirzaee@uq.edu.au; p.schenk@uq.edu.au

|                                                                                                   |   |
|---------------------------------------------------------------------------------------------------|---|
| <b>Table S1</b> Antagonistic microbial isolates and their lab ID with antimicrobial activity..... | 2 |
| <b>Table S2</b> Identification of microbial isolates with antimicrobial activity.....             | 3 |
| <b>Table S3</b> Media used in this study .....                                                    | 4 |
| <b>Figure S1</b> Screening and testing of soil and food spoilage microbial isolates .....         | 5 |
| <b>Figure S2</b> Supernatant antimicrobial plate assays.....                                      | 6 |
| <b>Figure S3</b> Electrophoresis of bacterial extracts with antimicrobial peptides.....           | 7 |
| <b>Figure S4</b> HPLC fractions inhibition assay against <i>Cmm</i> . ....                        | 9 |

**Table S1.** Antagonistic microbial isolates with antimicrobial activity.

| <i>P. syringae</i>                 | <i>C. michiganensis</i>                                          | <i>L. monocytogenes</i>                     | <i>E. coli</i> |
|------------------------------------|------------------------------------------------------------------|---------------------------------------------|----------------|
| 1YE, 33YE, 41YE,<br>45YE, 46YE     | 5LM, 10LM, 11LM,<br>12LM, 28LM,<br>30LM, 37LM                    | 8LM, 7LM, 9LM,<br>27LM, 32LM,<br>33LM, 35LM | 25LGS          |
| 28MC, 30MC,<br>34MC, 37MC,<br>46MC | 15MC, 19MC,<br>21MC, 22MC,<br>23MC, 24MC,<br>38MC, 42MC,<br>47MC | 19YE, 35YE, 39YE,<br>32YE, 44YE             |                |
| 14LGF, 12LGF                       | 28M, 36M, 41M,<br>37M, 42M, 43M,<br>46M, 47M                     | 1M, 1M1, 18M,<br>20M, 27M                   |                |
| 34LM                               | 6th, 9th, 10th, 18th                                             | 6th                                         |                |
| 14th                               | 4YE, 34YE, 46YE                                                  |                                             |                |
| 44LGF                              | 42LGS, 44LGS,<br>52LGS                                           |                                             |                |
|                                    | 23MR, 25MR                                                       |                                             |                |

**Table S2.** Identification of microbial isolates with antimicrobial activity.

| Isolate ID | Isolate scientific name                                                 | Coverage | Identity | Coverage | Identity |
|------------|-------------------------------------------------------------------------|----------|----------|----------|----------|
| 1M         | <i>Bacillus subtilis</i>                                                | 98%      | 98%      |          |          |
| 1M1        | <i>Bacillus subtilis</i> / <i>Bacillus velezensis</i>                   | 98%      | 97%      | / 98%    | 97%      |
| 18M        | <i>Bacillus pumilus</i>                                                 | 99%      | 98%      |          |          |
| 20M        | <i>Bacillus pumilus</i>                                                 | 96%      | 99%      |          |          |
| 27M        | <i>Bacillus safensis</i>                                                | 97%      | 99%      |          |          |
| 28M        | <i>Bacillus licheniformis</i>                                           | 98%      | 98%      |          |          |
| 36M        | <i>Staphylococcus saprophyticus</i> / <i>Staphylococcus xylosus</i>     | 97%      | 89%      | / 97%    | 89%      |
| 37M        | <i>Staphylococcus sciuri</i>                                            | 98%      | 99%      |          |          |
| 41M        | <i>Staphylococcus saprophyticus</i>                                     | 93%      | 99%      |          |          |
| 42M        | <i>Staphylococcus sciuri</i>                                            | 97%      | 99%      |          |          |
| 43M        | <i>Corynebacterium flavescens</i>                                       | 95%      | 99%      |          |          |
| 46M        | <i>Enterobacter ludwigii</i>                                            | 98%      | 99%      |          |          |
| 47M        | <i>Staphylococcus sciuri</i>                                            | 98%      | 99%      |          |          |
| 15MC       | <i>Pseudochrobactrum kiredjianaie</i>                                   | 98%      | 98%      |          |          |
| 19MC       | <i>Enterobacter ludwigii</i>                                            | 99%      | 99%      |          |          |
| 21MC       | <i>Enterobacter ludwigii</i>                                            | 95%      | 97%      |          |          |
| 22MC       | <i>Enterobacter ludwigii</i>                                            | 92%      | 98%      |          |          |
| 23MC       | <i>Enterobacter cloacae</i>                                             | 99%      | 99%      |          |          |
| 24MC       | <i>Enterobacter ludwigii</i>                                            | 98%      | 99%      |          |          |
| 28MC       | <i>Comamonas jiangduensis</i>                                           | 92%      | 99%      |          |          |
| 30MC       | <i>Proteus vulgaris</i>                                                 | 93%      | 97%      |          |          |
| 34MC       | <i>Ochrobactrum grignonense</i>                                         | 91%      | 97%      |          |          |
| 37MC       | <i>Ochrobactrum grignonense</i> / <i>Ochrobactrum pseudogrignonense</i> | 95%      | 99%      | / 96%    | 97%      |
| 38MC       | <i>Enterobacter ludwigii</i>                                            | 96%      | 94%      |          |          |
| 42MC       | <i>Enterobacter cloacae</i>                                             | 99%      | 99%      |          |          |
| 46MC       | <i>Enterobacter ludwigii</i>                                            | 99%      | 99%      |          |          |
| 47MC       | <i>Enterobacter ludwigii</i>                                            | 95%      | 89%      |          |          |
| 23MR       | <i>Lactobacillus plantarum</i>                                          | 95%      | 98%      |          |          |
| 25MR       | <i>Lactobacillus hilgardii</i>                                          | 92%      | 97%      |          |          |
| 1YE        | <i>Lysinibacillus fusiformis</i>                                        | 99%      | 99%      |          |          |
| 4YE        | <i>Brevibacillus laterosporus</i>                                       | 94%      | 99%      |          |          |
| 19YE       | <i>Sporosarcina aquimarina</i>                                          | 98%      | 99%      |          |          |
| 32YE       | <i>Sporosarcina aquimarina</i>                                          | 95%      | 99%      |          |          |
| 33YE       | <i>Bacillus amyloliquefaciens</i> / <i>Bacillus subtilis</i>            | 99%      | 99%      | / 99%    | 99%      |
| 34YE       | <i>Sporosarcina aquimarina</i>                                          | 97%      | 99%      |          |          |
| 35YE       | <i>Bacillus safensis</i>                                                | 95%      | 99%      |          |          |
| 39YE       | <i>Sporosarcina saromensis</i>                                          | 97%      | 98%      |          |          |
| 41YE       | <i>Bacillus amyloliquefaciens</i> / <i>Bacillus subtilis</i>            | 99%      | 99%      | / 99%    | 100%     |
| 44YE       | <i>Bacillus pumilus</i>                                                 | 92%      | 99%      |          |          |
| 45YE       | <i>Bacillus methylotrophicus</i>                                        | 99%      | 99%      |          |          |
| 46YE       | <i>Bacillus methylotrophicus</i>                                        | 97%      | 99%      |          |          |
| 6th        | <i>Bacillus pumilus</i>                                                 | 98%      | 96%      |          |          |
| 9th        | <i>Bacillus circulans</i>                                               | 95%      | 99%      |          |          |
| 10th       | <i>Bacillus safensis</i>                                                | 95%      | 99%      |          |          |
| 14th       | <i>Paenibacillus peoriae</i> / <i>Paenibacillus polymyxa</i>            | 98%      | 97%      |          |          |
| 18th       | <i>Bacillus megaterium</i>                                              | 98%      | 99%      |          |          |
| 5LM        | <i>Bacillus pumilus</i>                                                 | 96%      | 97%      |          |          |
| 7LM        | <i>Bacillus pumilus</i>                                                 | 98%      | 99%      |          |          |
| 8LM        | <i>Bacillus pumilus</i>                                                 | 97%      | 99%      |          |          |
| 9LM        | <i>Bacillus safensis</i>                                                | 95%      | 98%      |          |          |
| 10LM       | <i>Bacillus pumilus</i>                                                 | 97%      | 97%      |          |          |
| 11LM       | <i>Microbacterium oxydan</i>                                            | 97%      | 97%      |          |          |
| 12LM       | <i>Bacillus pumilus</i>                                                 | 98%      | 99%      |          |          |
| 27LM       | <i>Bacillus pumilus</i>                                                 | 98%      | 99%      |          |          |
| 28LM       | <i>Bacillus pumilus</i>                                                 | 98%      | 99%      |          |          |
| 30LM       | <i>Bacillus mojavensis</i>                                              | 97%      | 99%      |          |          |
| 32LM       | <i>Bacillus pumilus</i>                                                 | 95%      | 100%     |          |          |
| 33LM       | <i>Bacillus pumilus</i>                                                 | 95%      | 100%     |          |          |
| 34LM       | <i>Lysinibacillus fusiformis</i>                                        | 97%      | 99%      |          |          |
| 35LM       | <i>Bacillus pumilus</i>                                                 | 96%      | 99%      |          |          |
| 37LM       | <i>Lysinibacillus mangiferihumi</i>                                     | 98%      | 99%      |          |          |
| 12LGF      | <i>Pseudochrobactrum kiredjianaie</i>                                   | 98%      | 97%      |          |          |
| 14LGF      | <i>Pseudochrobactrum kiredjianaie</i>                                   | 93%      | 99%      |          |          |
| 44LGF      | <i>Klebsiella pneumoniae</i>                                            | 84%      | 89%      |          |          |
| 25LGS      | <i>Bacillus subtilis</i>                                                | 96%      | 96%      |          |          |
| 42LGS      | <i>Bacillus methylotrophicus</i>                                        | 97%      | 99%      |          |          |
| 44LGS      | <i>Bacillus megaterium</i>                                              | 97%      | 99%      |          |          |
| 52LGS      | <i>Bacillus megaterium</i>                                              | 98%      | 99%      |          |          |

**Table S3.** Media used in this study (shown as per L)

| <b>LM</b>                                                                                                                                                    | <b>Mannitol</b>                                                                                                                                                                                                                                                                     | <b>MacConkey</b>                                                                                                                                                    | <b>Thornton</b>                                                                                                                                                                                                                                       | <b>YEP</b>                                                                          |
|--------------------------------------------------------------------------------------------------------------------------------------------------------------|-------------------------------------------------------------------------------------------------------------------------------------------------------------------------------------------------------------------------------------------------------------------------------------|---------------------------------------------------------------------------------------------------------------------------------------------------------------------|-------------------------------------------------------------------------------------------------------------------------------------------------------------------------------------------------------------------------------------------------------|-------------------------------------------------------------------------------------|
| Bactotryptone: 10.0 g<br>Bacto yeast extract: 6.0 g<br>K <sub>2</sub> HPO <sub>4</sub> : 1.5 g<br>NaCl: 0.6 g<br>MgSO <sub>4</sub> .7H <sub>2</sub> O: 0.4 g | NaCl: 75.0 g<br>Proteose Peptone: 10.0 g<br>Mannitol: 10.0 g<br>Beef Extract: 1.0 g<br>Phenol Red: 0.025g<br>Agar: 18.0 g                                                                                                                                                           | Peptone: 17.0 g<br>Lactose: 10.0 g<br>NaCl: 5.0 g<br>Proteose Peptone: 3.0 g<br>Bile Salts: 1.5 g<br>Neutral Red: 30.0 mg<br>Crystal Violet: 1.0 mg<br>Agar: 18.0 g | Maninitol: 1.0 g<br>Asparagine: 0.5 g<br>K <sub>2</sub> Hpo <sub>4</sub> : 1.0 g<br>KNO <sub>3</sub> : 0.5g<br>MgSO <sub>4</sub> .7H <sub>2</sub> O: 0.2 g<br>CaCl <sub>2</sub> : 0.1 g<br>NaCl: 0.1 g<br>FeCl <sub>3</sub> : 0.002 g<br>Agar: 18.0 g | Bactotryptone: 10.0 g<br>Bacto yeast extract: 10.0 g<br>NaCl: 5.0 g<br>Agar: 18.0 g |
| <b>AG*</b>                                                                                                                                                   | <b>MRS</b>                                                                                                                                                                                                                                                                          | <b>TSA</b>                                                                                                                                                          | <b>Sucrose media</b>                                                                                                                                                                                                                                  | <b>LB</b>                                                                           |
| Bactotryptone: 5.0 g<br>Bacto yeast extract: 5.0 g<br>Spirulina Algae Powder: 5.0 g<br>NaCl: 5.0 g<br>Agar: 18.0 g                                           | Dextrose: 20.0 g<br>Peptic Digest of Animal Tissue: 10.0 g<br>Beef Extract: 10.0 g<br>Yeast Extract: 5.0 g<br>Sodium Acetate: 5.0 g<br>Disodium Phosphat: 2.0 g<br>Ammonium Citrate: 2.0 g<br>Tween <sup>®</sup> 80: 1.0 g<br>Magnesium Sulfate: 0.1 g<br>Manganese sulfate: 0.05 g | Tryptone: 15.0 g<br>Soytone: 5.0 g<br>NaCl: 5.0 g<br>Agar: 18 g                                                                                                     | Sucrose: 20.0 g<br>Peptone: 5.0 g<br>K <sub>2</sub> HPO <sub>4</sub> : 0.5 g<br>MgSO <sub>4</sub> .7H <sub>2</sub> O: 0.25 g<br>Agar: 18.0 g                                                                                                          | Bactotryptone: 10.0 g<br>Bacto yeast extract: 5.0 g<br>NaCl: 10.0 g                 |

\* New medium formulation

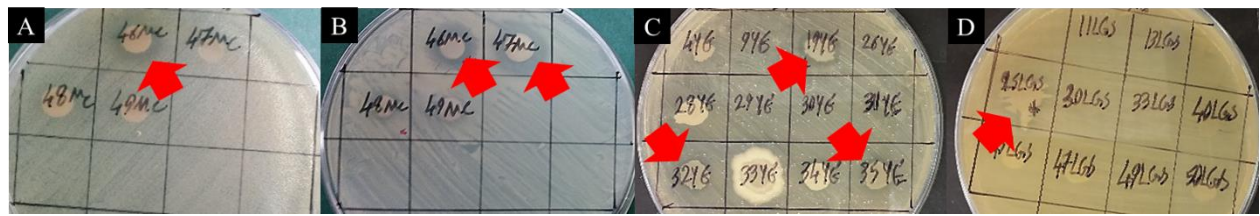

**Figure S1. Screening and testing of soil and food spoilage microbial isolates (~600) against (A) *Pst*, (B) *Cmm*, (C) *L. monocytogenes*, and (D) *E. coli*.**

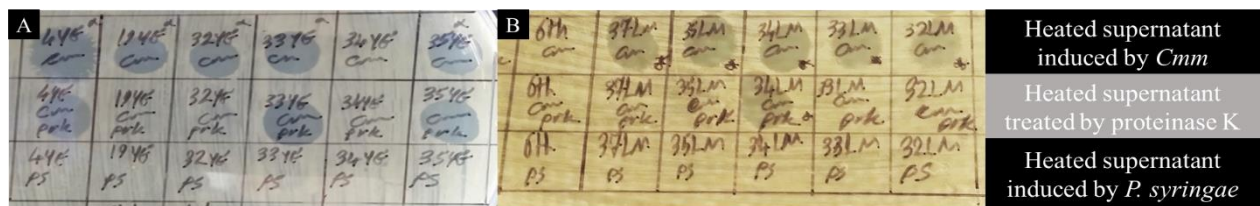

**Figure S2. Supernatant antimicrobial plate assays.** (A) *Cmm* and (B) *L. monocytogenes* bacterial lawns. The first row shows the isolates' heated supernatant induced by *Cmm*, the second row shows the proteinase K-treated samples, and the third row is the isolates' heated supernatant induced by *Pst*. No growth inhibition was found when the medium only was used.

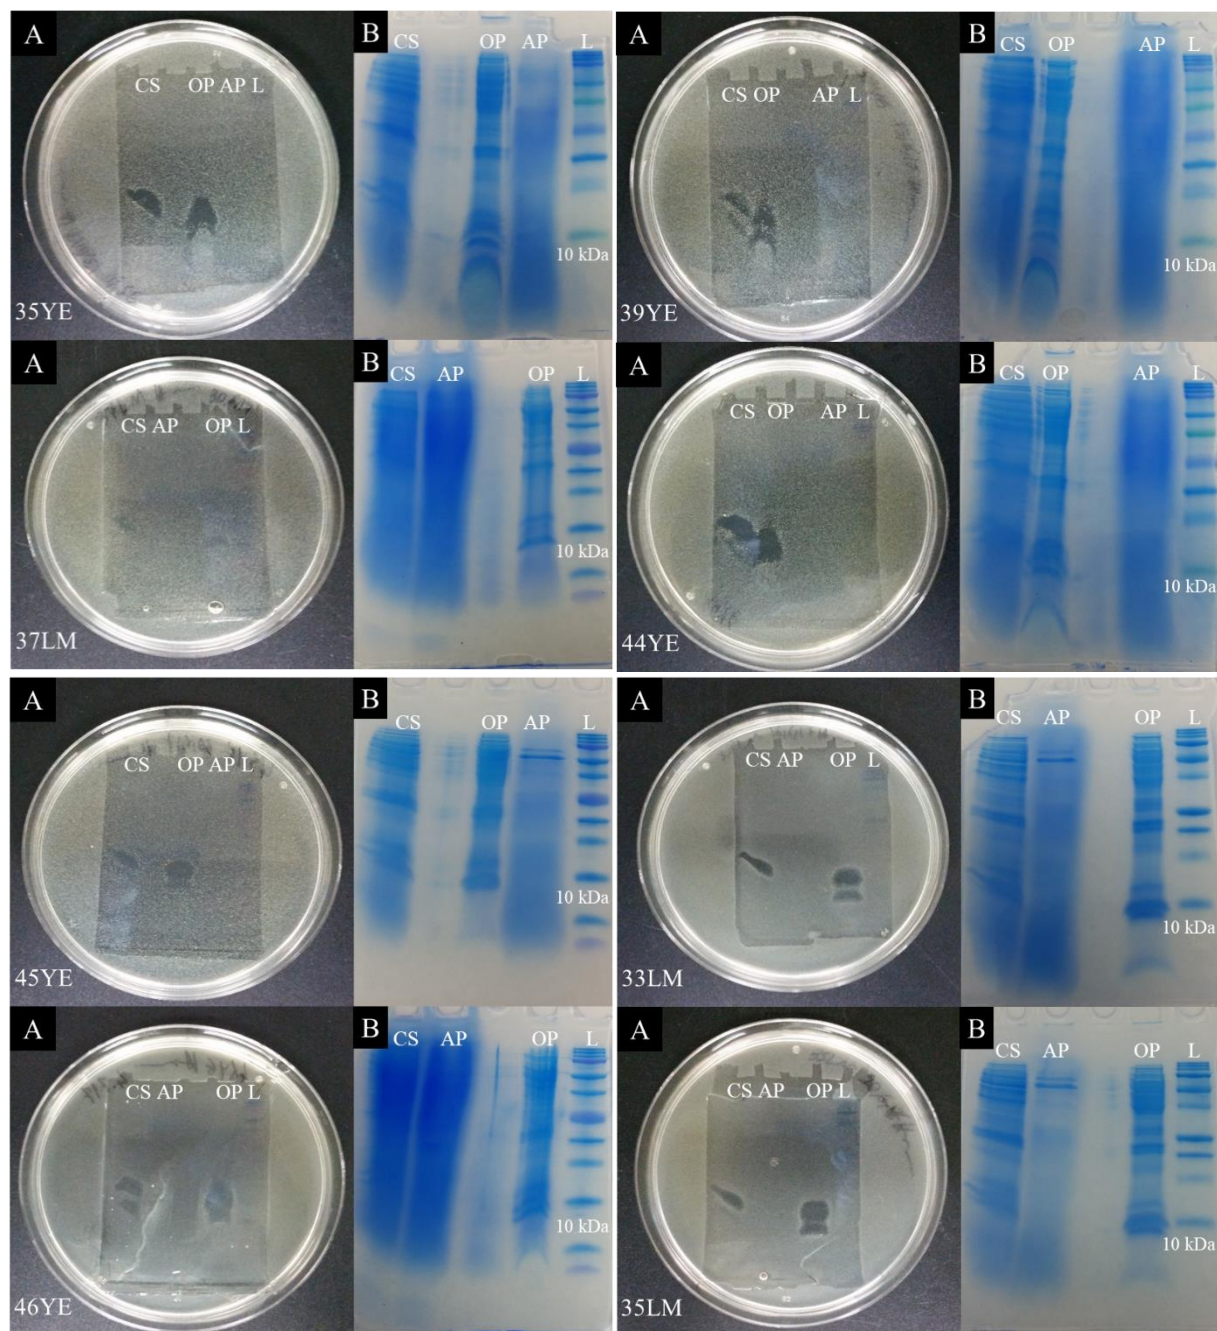



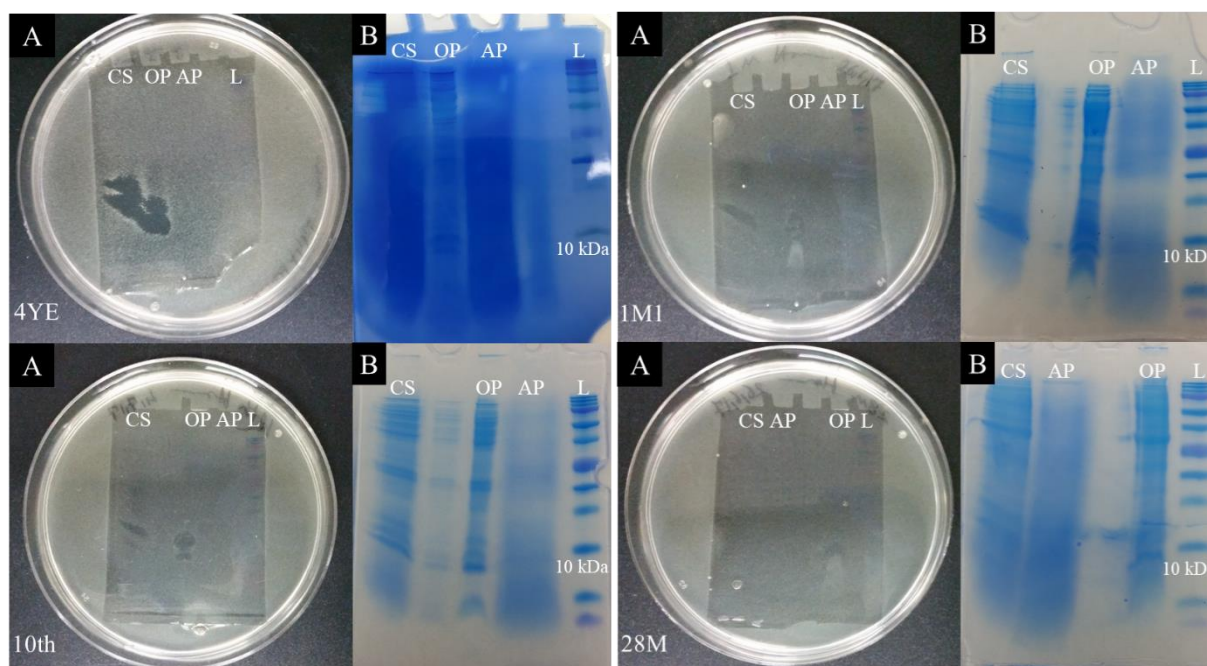

**Figure S3. Electrophoresis of bacterial supernatants with antimicrobial peptides.** The gel was divided into two halves: (A) One of the halves containing supernatants of different bacterial isolates was challenged with *L. monocytogenes* as a “gel plate assay”. (B) The other half of the gel with identical samples was stained with Coomassie Brilliant Blue for visualizing and recovering the band(s) for further characterization. CS: crude supernatant, OP: organic phase, AP: aqueous phase, and L: protein standard.



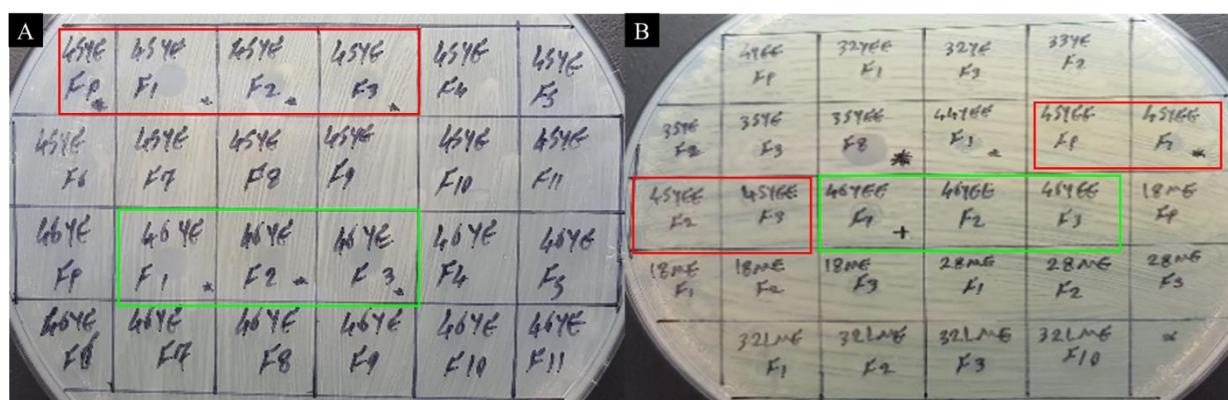

**Figure S4. HPLC fractions inhibition assay against *Cmm*.** (A) without proteinase K treatment; (B) after proteinase K treatment.
