# Supplementary material
Source: MDPI journal article supplement (https://www.mdpi.com/1424-8247/14/12/1232)

**Graph 1. Elution from 4YE (*Brevibacillus laterosporus*)**

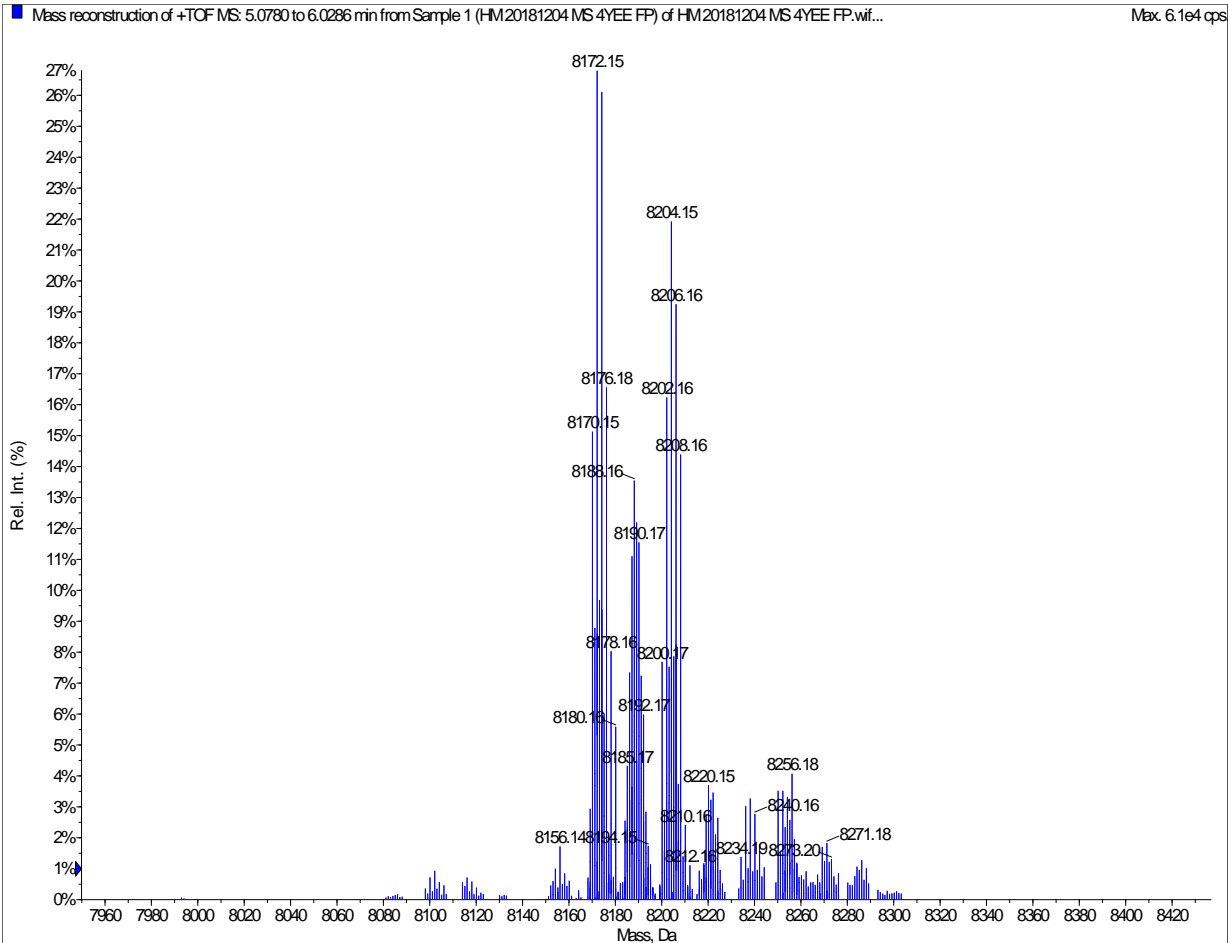

Graph 2. Elution from 35YE (*Bacillus safensis*)

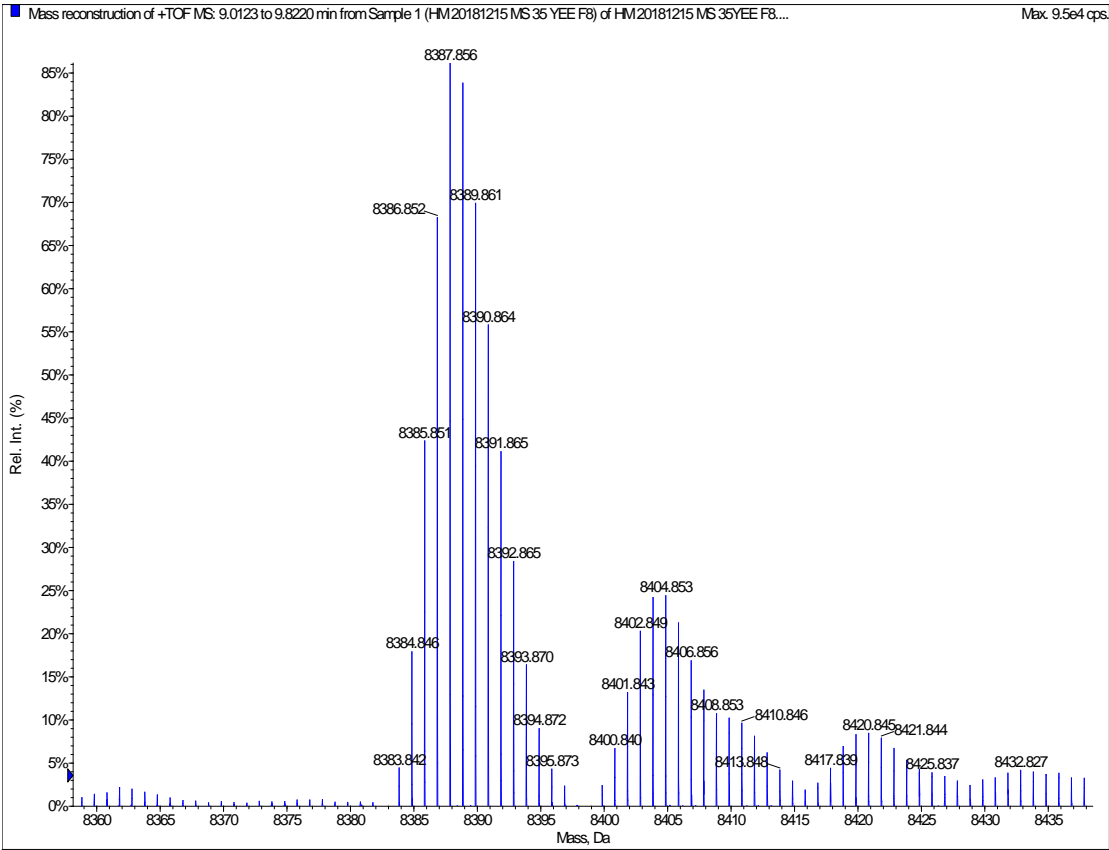

Graph 3. Elution from 10th (*Bacillus safensis*)

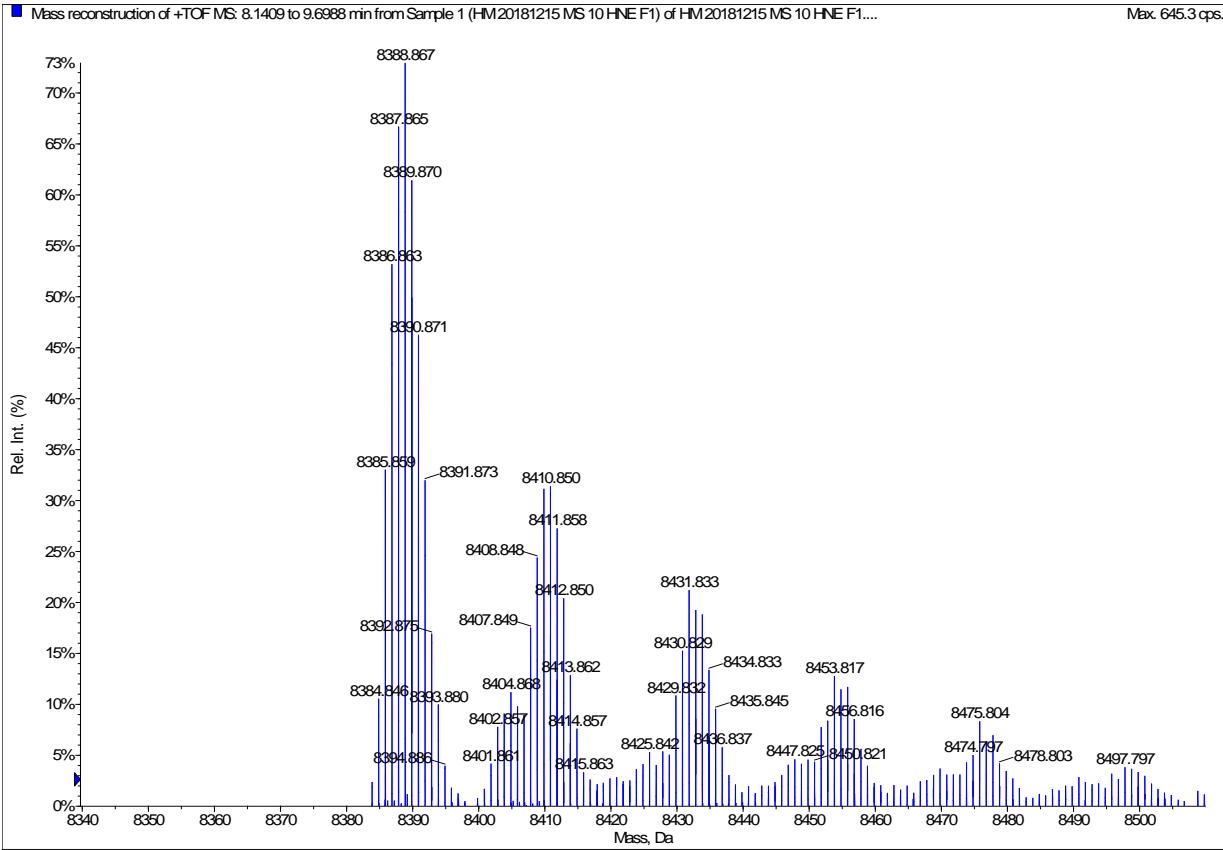

**Graph 4. Elution from 35LM (*Bacillus pumilus*)**

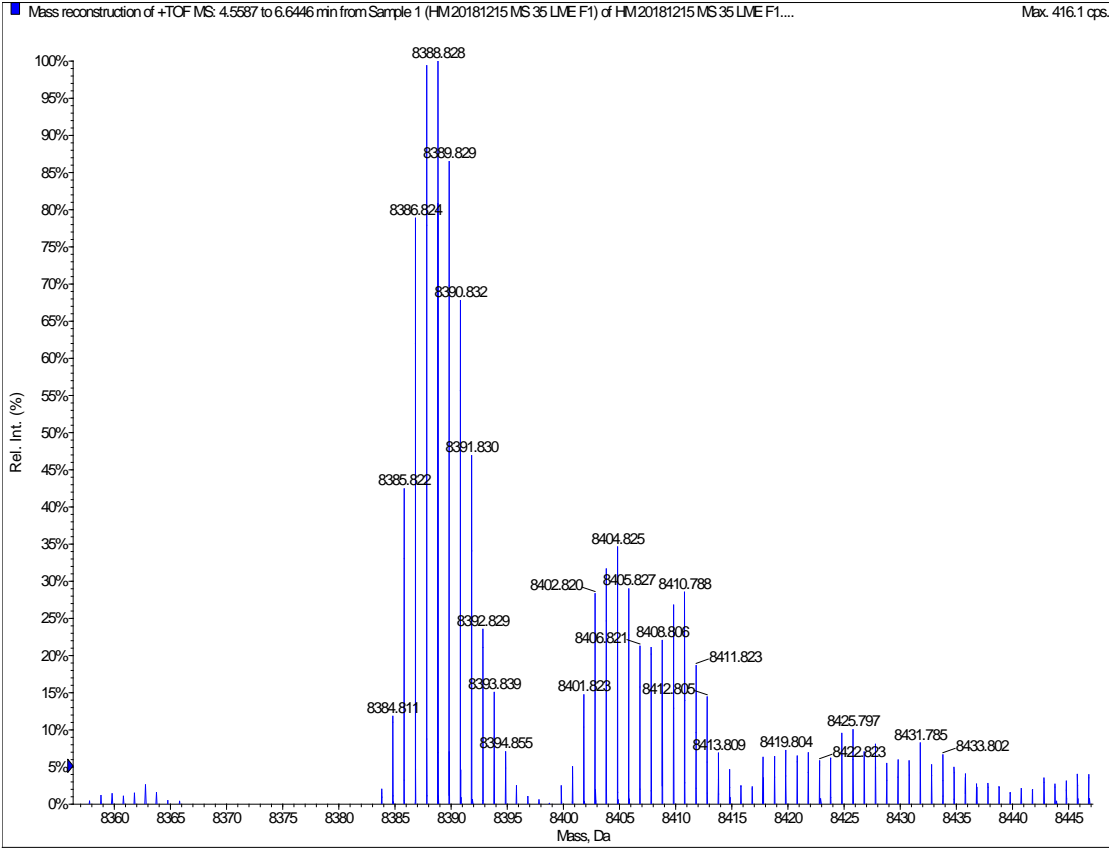

Graph 5. Elution from 35LM (*Bacillus pumilus*)

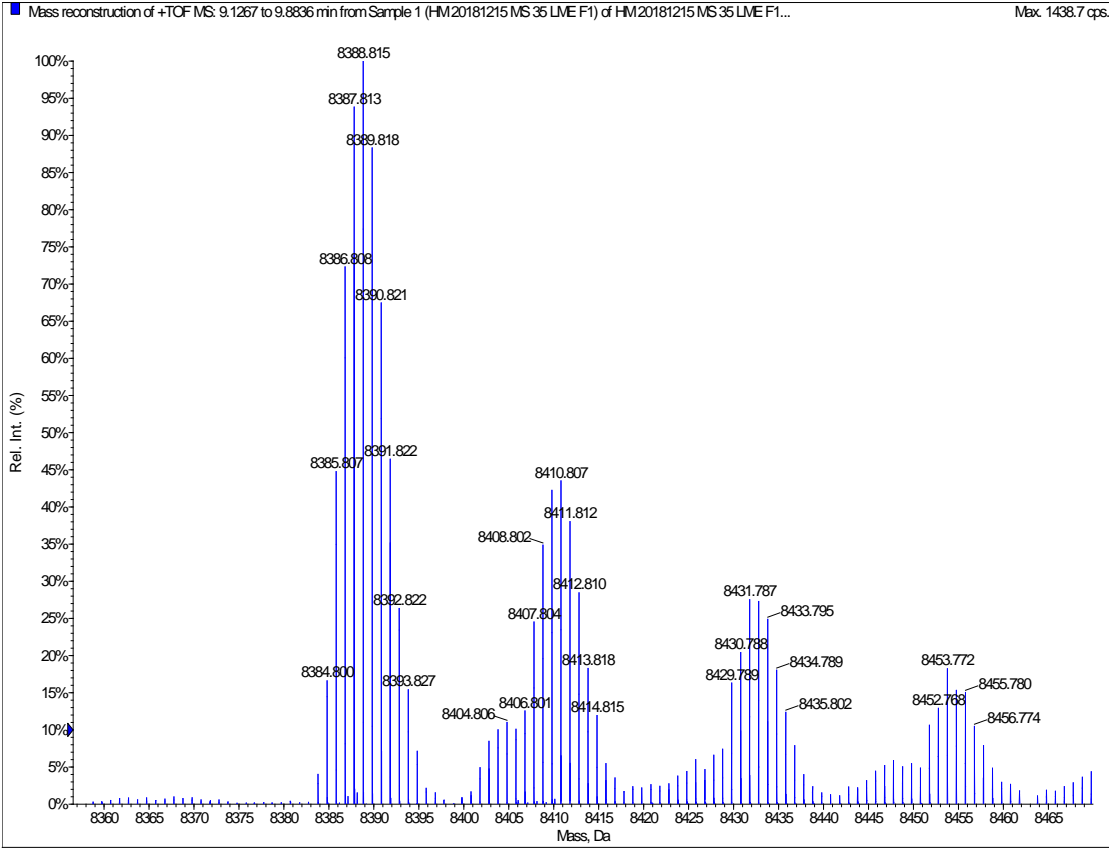

**Graph 6. Elution from 35LM (*Bacillus pumilus*)**

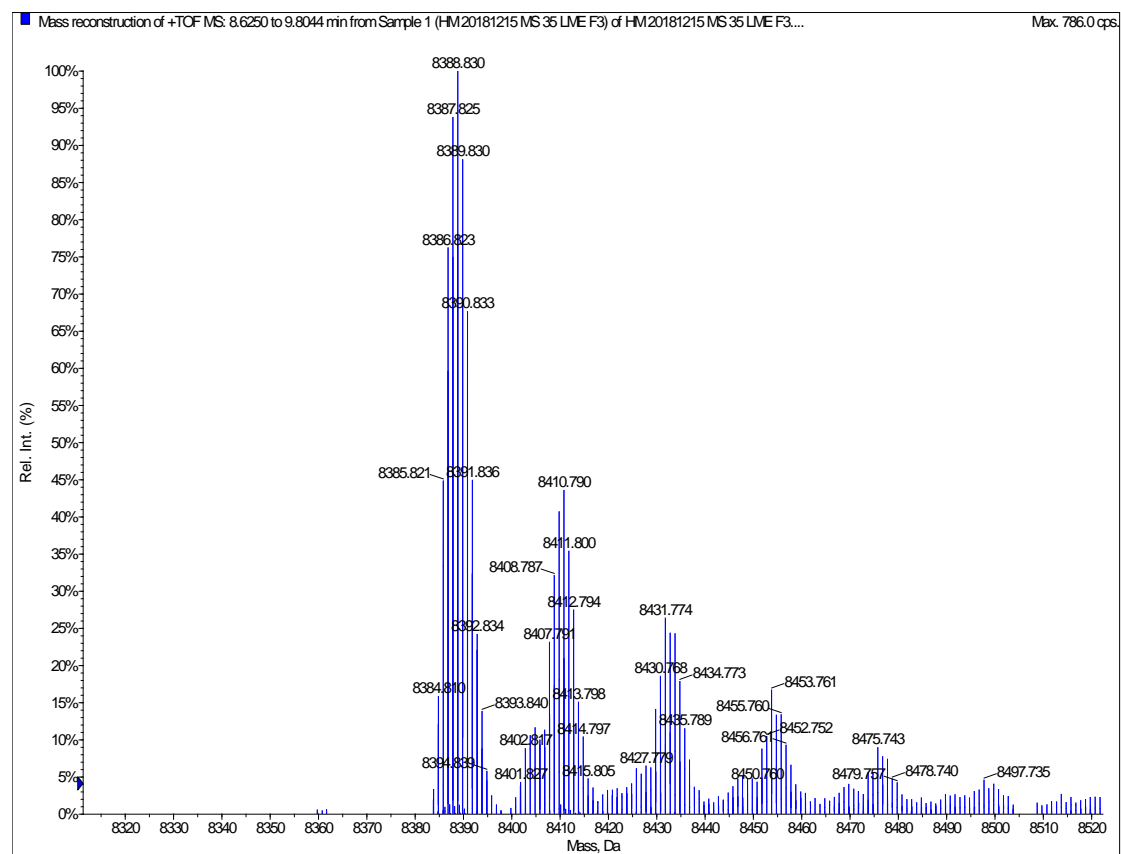

Supplement: s1 [file s1]
